# Supplementary material
Source: PubMed Central journal article supplement (PMC6726993)
Supplement: ajcr0009-1695-f7.pdf [file ajcr0009-1695-f7.pdf]

Circular RNA circ-ADD3 in hepatocellular carcinoma

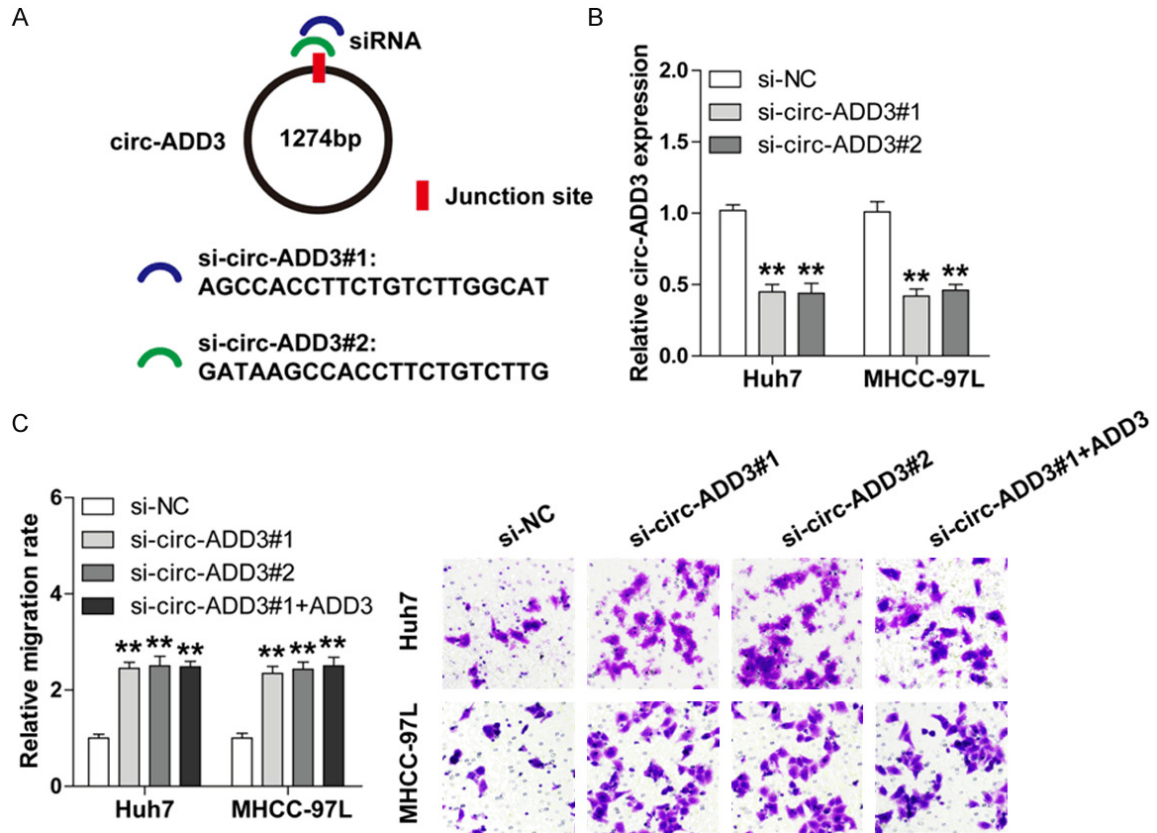

**Supplementary Figure 1.** Knockdown of circ-ADD3 promotes HCC cell migration. A. The sequences of two siRNAs targeting the junction site of circ-ADD3. B. qRT-PCR analysis of circ-ADD3 expression in Huh7 and MHCC-97L cells transfected with the indicated siRNAs. C. Transwell migration assay in Huh7 and MHCC-97L cells transfected with the indicated siRNAs and ADD3 expression vector. \*\* $P < 0.01$ .

## Circular RNA circ-ADD3 in hepatocellular carcinoma

### Protein:

MGQTGKKSEKGPVCWRKRVKSEYMRLRQLKRFRRRADEVKSMFSSNRQKILERTEILNQEW  
KORRIQPVHILTSVSSLRGTRECSVTSDLDFPTQVIPLKTLNAVASVPIMYSWSPLQQNF  
MVEDETVLHNIPYMGDEVLDQDGTFFIELIKNYDGKVHGDRECGFINDEIFVELVNLGQ  
YNDDDDDDDDGDDPEEREKQKQLEDHRDDKESRPPRKFP SDKIFEAISSMFPDKGTAEEL  
KEKYKELTEQQLPGALPPECTPNIDGPNKSVQREQLSHSFHTLFCRRCFKYDCFLHRKC  
NYSFHATPNTYKRKNTETALDNKPCGPQCYQHLEGAKEFAAALTAERIKTPPKRPGRRR  
GRLPNNSSRPSTPTINVLKSDTSDREAGTETGGENNDKEEEEKKDETSSSSEANSRCQ  
TPIKMKPIEPPENVEWSGAEASMFRLVIGTYD NFC AIARLIGTKTCRQVYEFVKESS  
IIAPAPAEDVDTPPRKKRKHRLWAAHCRKIQLKKGSSNHVYNYQPCDHPRQPCDSSCP  
CVIAQNFCEKFCQCSSECQNRFPGCRCKAQCNKQCPCYLAVRECDPDLCLTCGAADHW  
SKNVSCKNCSIQRGSKKHLLLAPSDVAGWGIFIKDPVQKNEFISEYCGEISQDEADRRG  
KYVDKYMCSFLFNLNDFVVDATRKGNKIRFANHSVNPNCYAKVMMVNGDHRIGIFAKRA  
IQTGEELFFDYRYSQADALKYVGIEREMEIP

EZH2  
protein

### RNA:

GUCUUGGCAUGGUCACACCUAUAUAUGACCUUCCUGGUGCAGAUACAUCUCAUAUGUGA  
AGGGAGAAAAACUUAUCUCGUGUAACUUGCCAGCCUGUACAGACUUGUAGACUUGUUUG  
GAUGGGCACACCUGGCAAUACCUAUAUCUCAGUAAGAAUAAGUAAGGAGCAAGACCACA  
UUUAUAAUAAUCCAGAGGCCUAUCUUUUUCUGAAGCUACAGCCUCCAAUUGGUGAAAG  
UCAUAUAAUAGGAGAAGUGGUUGACCAGGGAAGUACCAAUUUGAAAAUUGACCAUACAG  
GAUUCAGUCCCAUGCUGCAAUCUAUUAACACGUCUUGAUGUUAAGUGUGUAUACACA  
UCCAUACCCUUGCAACAGCAGCUGUAUCCUCCAUAGAAUUGGGAUCCUCCAAUUUCUC  
AAGAGUCUCUUCUUCUGGGAGAUUUGCCUUAUUAUGACUACCAAGGGUCACUUGAAGAAC  
AGGAGGAGAGAAUUCACUCGAGAAGGUUCUGGGACCAAGUUGUAAGGUGCUGGUACUCA  
GGAUUAUGGUGUGGUUGCACUUGGAGAAACAUUAGAGGAGGCCUUUUAUAUUAUUUUUA  
AUGUGCAACUAGCCUGUGAGAUUCAGGUGCAGGCCUAGCAGGUGCAGGUGGAGUAGACA  
AUCUCCAUUGUACUGGACUUUCAGAAGUAUAAAGCUUUCACUUAACACUGUAGCAGCGUCUG  
GUGGAGGAGGUGUGAAUUGGGUUCUCAAAAAUGGAAGGUUGGCGAAAUUGAGUUUG  
AAGGGCUUAUGAGGACUCUGGACAACUUGGGGUUAUAGAACAGGCUAUGCUUACAGGCAUC  
CUCUCAUUCGAGAGAAGCCUAGGCACAAGAGUGAUGUGGAAAUCCAGCAACUGUGACUG  
CUUUUUCCUUUGAAGACGAUACAGUGCCACUCUCUCCUCUCAAAUACAUGGCACAGAGGC  
AACAGCGUGAAAAACAAGAUAGGCUAAGCUCACCAAAUACUUAACAUGAAAGUGAAUGUGC  
CUGAGGAGUCUCGGAACGGAGAAACCAGUCCCGAACCAAAUACACUGGAUGAAAGCAG  
AAGACUCAUCUAAAGUUAUGUGGUGGAACACCUAUCAAAAUUGAAGAUCCAAUACAGUUUG  
UUCUUUAAACACAAACCCGAAUGAGGUACUAGAAAAGAGAAAUAAGAUUCGGGAACAAA  
AUCGAUAUGACUUGAAAACAGCAGGACCACAUCUCAGUUGCUUGCUGGAAUUGUUGUGG  
AUAAGCCACCUUCU

circ-ADD3

### Interaction probabilities

Prediction using RF classifier 0.8

Prediction using SVM classifier 0.96

**Supplementary Figure 2.** The interaction probability between circ-ADD3 and EZH2 was predicted by RPISeq online software based on RF and SVM classifiers (probabilities > 0.5 were considered "positive").

## Circular RNA circ-ADD3 in hepatocellular carcinoma

### Protein:

MEDYTKIEKIGEGTYGVVYKGRHKTTGQVWAMKKIRLESEEEGVPSTAIRESLLKELRH  
 PNIVSLQDVLMDQSRLYLIFEFLSMDLKKYLDSSIPGQYMDSSLVKSYLEYLQILQGIVFCH  
 SRRVLRDLKPNQLLIDDKGTIKLADFLARAFGIPIRVYTHEVTLWYRSPEVLLGSAR  
 YSTPVDIWSIGTIFAEATKKPLFHGDSEIDLFRIFRALGTPNNEVWPEVESLQDYKNT  
 FPKWKPGSLASHVKNLDENGLDLLSKMLIYDPAKRISGKMLNHPYFNDLDNQIKKM

CDK1p  
 rotein

### RNA:

GUCUUGGCAUGGUCACACCUAUCUAUGACCUUCCUGGUGCAGAUACAUCUCAUAUGUGA  
 AGGGAGAAAAACUACUCGCUAUAACUUGCCAGCCUGUACAGACUUGUAGACUUGUUUG  
 GAUGGGCACACCUUGGCAAAUACCUAUAUCUCAGUAAGAAUAAGUAAGGAGCAAGACCACA  
 UUAUAAUAAUJCCCAGAGGCCUAUCUUUUUCUGAAGCUACAGCCUCCAAUUUGGUGAAAG  
 UCAAUAUAAUAGGAGAAGUGGUUUGACCAGGGAAGUACCAAUUUUGAAAAUUGACCAUACAG  
 GAUUCAGUCCCAUGCUGCAAUUAUUAACACGUCCUGAUGUUUAGUGUGUGAUACACA  
 UCCAUAACCCUUGCAACAGCAGCUGUAUCCUCCAUGAAAUGUGGGAUCCUCCAUUUCUC  
 AAGAGUCUCUUCUUCUGGGAGAUGUUGCCUAUUAUGACUACCAAGGGUCACUUGAAGAAC  
 AGGAGGAGAGAAUUAACUCGCAAGGUUCUGGGACCAAGUUGUAAGGUGCUGGUACUCA  
 GGAAUCAUGGUGUGGUUGCACUUGGAGAAACAUAAGAGGAGGCCUUUUAUUUUUUUA  
 AUGUGCAACUAGCCUGUGAGAUUCAGGUGCAGGCCCUAGCAGGUGCAGGUGGAGUAGACA  
 AUCUCCAUGUACUGGACUUUCAGAAGUAUAAAGCUUUCACUUACACUGUAGCAGCGUCUG  
 GUGGAGGAGGUGUGAAUUGGGUUCUCAAAAAUUGGAAGGUUGGCGAAAUUGAGUUUG  
 AAGGGCUUAUGAGGACUCUGGACAACUUGGGUUAUAGAACAGGCUAUGCUUACAGGCAUC  
 CUCUCAUUCGAGAGAAGCCUAGGCACAAGAGUGAUGUGGAAUCCAGCAACUGGACUG  
 CUUUUUCUUUGAAGACGAUACAGUGCCACUCUCUCCUCUCAAAUACAUGGCACAGAGGC  
 AACAGCGUGAAAAACAAGAUGGCUGAACUCACCAAAUACUUACAUGAAAGUGAAUGUGC  
 CUGAGGAGUCUCGGAACGGAGAAACCAGUCCCCGAACCAAAAUCACGUGGAUGAAAGCAG  
 AAGACUCAUCUAAAGUUAGUGGUGGAACACCUAUCAAAAUUGAAGAUCCAAUUCAGUUUG  
 UUCUUUAAACACAAACCCGAAUGAGGUACUAGAAAAGAGAAAUAAGAUUCGGGAACAAA  
 AUCGAUAUGACUUGAAAACAGCAGGACCACAAUCUCAGUUGCUUGCUGGAAUUGUUGUGG  
 AUAAGCCACCUUCU

circ-ADD3

### Interaction probabilities

Prediction using RF classifier 0.85

Prediction using SVM classifier 0.96

Supplementary Figure 3. The interaction probability between circ-ADD3 and CDK1 was predicted by RPISeq online software based on RF and SVM classifiers (probabilities > 0.5 were considered "positive").

### Uncropped blots

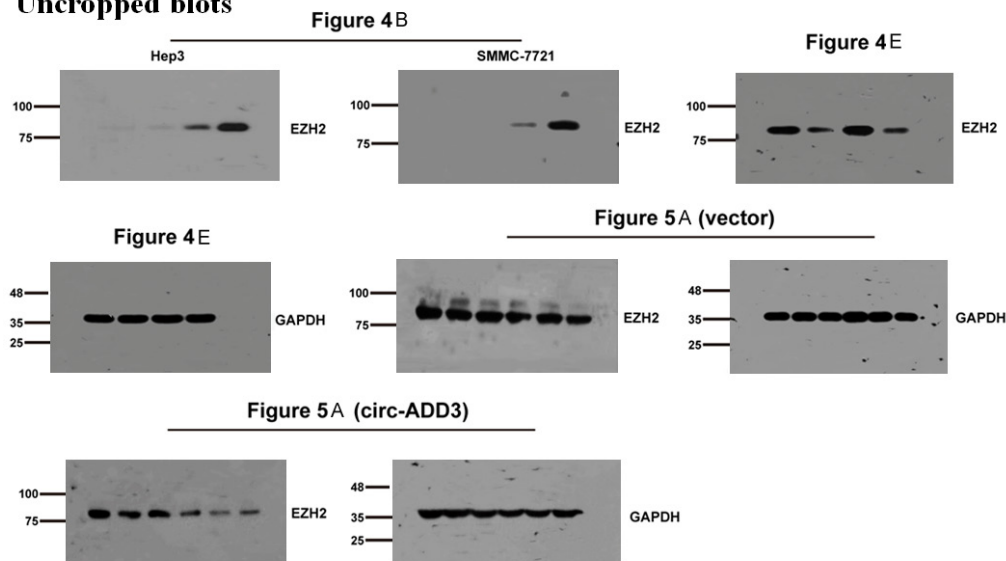

# Circular RNA circ-ADD3 in hepatocellular carcinoma

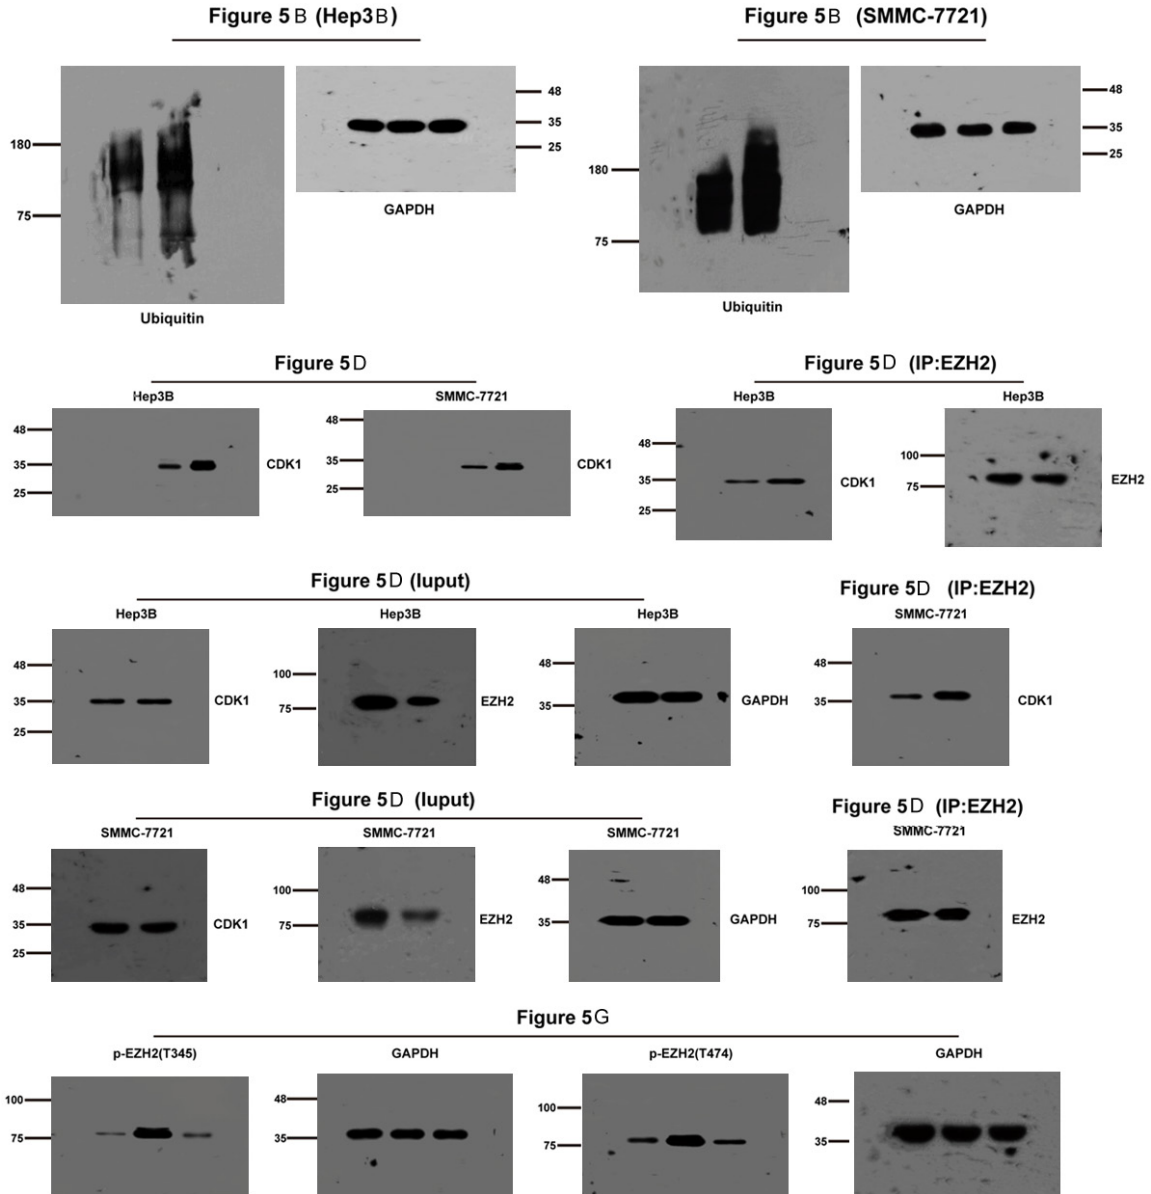

**Supplementary Figure 4.** The amino acid sequence alignment between hsa-circ-ADD3 and homologous mus-circ-ADD3. The data showed 87% similarity between them.
